# Supplementary material for: Extremely bulky amido-group 14 element chloride complexes: Potential synthons for low oxidation state main group chemistry
Source: Royal Society of Chemistry journal article supplement (doi:10.1039/c1dt10678c), 2011-01-01
Supplement: c1dt10678c.pdf [file c1dt10678c.pdf]

S1

**Extremely Bulky Amido-Group 14 Element Chloride Complexes: Potential Synthons for Low  
Oxidation State Main Group Chemistry**

**Jiaye Li, Andreas Stasch, Christian Schenk and Cameron Jones\***

School of Chemistry, PO Box 23, Monash University, VIC, 3800, Australia.

**SUPPLEMENTARY MATERIAL**

**Table S1.** Summary of crystallographic data for **1**, **3**, **4**, **7**, **9**, **10**, **12**, **13**, **15**, [Li(L){N(SiMe<sub>3</sub>)(Ar\*)}] (L = OEt<sub>2</sub> **1S** or THF **2S**);

[Na(THF)<sub>3</sub>{N(SiMe<sub>3</sub>)(Ar\*)}] **3S** and [K(OEt<sub>2</sub>){N(SiPh<sub>3</sub>)(Ar\*)}] **4S**.

|                                        | <b>1</b>                            | <b>3</b>                            | <b>4</b>                                | <b>7</b>                                | <b>9</b> ·(OEt <sub>2</sub> ) <sub>1.5</sub>             | <b>10</b> ·(toluene) <sub>2</sub>                                                              | <b>12</b>                                                        |
|----------------------------------------|-------------------------------------|-------------------------------------|-----------------------------------------|-----------------------------------------|----------------------------------------------------------|------------------------------------------------------------------------------------------------|------------------------------------------------------------------|
| empirical formula                      | C <sub>36</sub> H <sub>37</sub> NSi | C <sub>51</sub> H <sub>43</sub> NSi | C <sub>36</sub> H <sub>36</sub> ClGeNSi | C <sub>36</sub> H <sub>36</sub> CINSiSn | C <sub>57</sub> H <sub>57</sub> CINO <sub>1.5</sub> SiSn | C <sub>86</sub> H <sub>88</sub> Cl <sub>2</sub> N <sub>2</sub> Pb <sub>2</sub> Si <sub>2</sub> | C <sub>36</sub> H <sub>36</sub> Cl <sub>3</sub> NSi <sub>2</sub> |
| formula weight                         | 511.76                              | 697.95                              | 618.79                                  | 664.89                                  | 962.27                                                   | 1691.04                                                                                        | 645.19                                                           |
| crystal system                         | orthorhombic                        | monoclinic                          | triclinic                               | triclinic                               | triclinic                                                | triclinic                                                                                      | triclinic                                                        |
| space group                            | <i>Pnma</i>                         | <i>P2<sub>1</sub>/c</i>             | <i>P</i> -1                             | <i>P</i> -1                             | <i>P</i> -1                                              | <i>P</i> -1                                                                                    | <i>P</i> -1                                                      |
| <i>T</i> (K)                           | 173(2)                              | 123(2)                              | 173(2)                                  | 173(2)                                  | 123(2)                                                   | 173(2)                                                                                         | 173(2)                                                           |
| <i>a</i> (Å)                           | 16.6936(8)                          | 20.5915(12)                         | 9.839(2)                                | 9.799(2)                                | 13.4198(3)                                               | 9.8669(4)                                                                                      | 10.0788(7)                                                       |
| <i>b</i> (Å)                           | 22.4261(9)                          | 10.8266(5)                          | 18.298(4)                               | 18.329(4)                               | 14.0960(3)                                               | 13.0330(5)                                                                                     | 13.1075(9)                                                       |
| <i>c</i> (Å)                           | 7.6390(3)                           | 17.5359(7)                          | 19.291(4)                               | 19.472(4)                               | 14.4193(3)                                               | 15.5728(7)                                                                                     | 13.1687(9)                                                       |
| <i>α</i> (deg.)                        | 90                                  | 90                                  | 104.22(3)                               | 103.50(3)                               | 66.512(2)                                                | 79.153(2)                                                                                      | 90.754(3)                                                        |
| <i>β</i> (deg)                         | 90                                  | 95.691(5)                           | 98.69(3)                                | 98.96(3)                                | 81.228(2)                                                | 84.525(2)                                                                                      | 108.006(4)                                                       |
| <i>γ</i> (deg.)                        | 90                                  | 90                                  | 104.60(3)                               | 104.63(3)                               | 86.827(2)                                                | 72.621(2)                                                                                      | 96.141(4)                                                        |
| vol (Å <sup>3</sup> )                  | 2859.8(2)                           | 3890.1(3)                           | 3172.7(11)                              | 3203.5(11)                              | 2472.33(9)                                               | 1875.38(13)                                                                                    | 1643.0(2)                                                        |
| <i>Z</i>                               | 4                                   | 4                                   | 4                                       | 4                                       | 2                                                        | 1                                                                                              | 2                                                                |
| <i>ρ</i> (calcd) (g.cm <sup>-3</sup> ) | 1.189                               | 1.192                               | 1.295                                   | 1.379                                   | 1.293                                                    | 1.497                                                                                          | 1.304                                                            |
| <i>μ</i> (mm <sup>-1</sup> )           | 0.107                               | 0.097                               | 1.113                                   | 0.943                                   | 0.636                                                    | 4.632                                                                                          | 0.379                                                            |
| <i>F</i> (000)                         | 1096                                | 1480                                | 1288                                    | 1360                                    | 998                                                      | 844                                                                                            | 676                                                              |

S3

|                                                             |             |             |             |             |                            |             |             |
|-------------------------------------------------------------|-------------|-------------|-------------|-------------|----------------------------|-------------|-------------|
| reflections collected                                       | 37410       | 17699       | 21013       | 21201       | 16094                      | 41818       | 46831       |
| unique reflections                                          | 2569        | 7218        | 11121       | 11268       | 9670                       | 7238        | 6423        |
| $R_{\text{int}}$                                            | 0.0767      | 0.0219      | 0.0443      | 0.0527      | 0.0652                     | 0.0687      | 0.0432      |
| R1 indices [ $I > 2\sigma(I)$ ]                             | 0.0491      | 0.0399      | 0.0457      | 0.0452      | 0.0444                     | 0.0363      | 0.0476      |
| wR2 indices (all data)                                      | 0.1185      | 0.0977      | 0.1129      | 0.1155      | 0.1281                     | 0.0726      | 0.1021      |
| Largest peak and hole<br>( $\text{e} \cdot \text{Å}^{-3}$ ) | 0.30, -0.33 | 0.40, -0.37 | 0.38, -0.46 | 1.08, -0.74 | 1.96 (near Sn1), -<br>0.67 | 1.18, -0.75 | 0.32, -0.36 |

|                   | <b>13</b>                                           | <b>15</b>                                           | <b>1S</b>                                 | <b>2S</b>                                 | <b>3S</b>                                          | <b>4S</b>                                |
|-------------------|-----------------------------------------------------|-----------------------------------------------------|-------------------------------------------|-------------------------------------------|----------------------------------------------------|------------------------------------------|
| empirical formula | $\text{C}_{46}\text{H}_{40}\text{Cl}_3\text{NSi}_2$ | $\text{C}_{36}\text{H}_{37}\text{Cl}_2\text{NSi}_2$ | $\text{C}_{40}\text{H}_{46}\text{LiNOSi}$ | $\text{C}_{40}\text{H}_{44}\text{LiNOSi}$ | $\text{C}_{48}\text{H}_{60}\text{NNaO}_3\text{Si}$ | $\text{C}_{55}\text{H}_{52}\text{KNOSi}$ |
| formula weight    | 769.32                                              | 610.75                                              | 591.81                                    | 589.79                                    | 750.05                                             | 810.17                                   |
| crystal system    | triclinic                                           | monoclinic                                          | triclinic                                 | triclinic                                 | triclinic                                          | triclinic                                |
| space group       | $P-1$                                               | $P2_1/c$                                            | $P-1$                                     | $P-1$                                     | $P-1$                                              | $P1$                                     |
| $T$ (K)           | 123(2)                                              | 173(2)                                              | 123(2)                                    | 123(2)                                    | 123(2)                                             | 123(2)                                   |
| $a$ (Å)           | 10.4843(7)                                          | 12.5080(7)                                          | 9.8835(6)                                 | 9.7625(4)                                 | 10.8967(7)                                         | 10.6752(4)                               |
| $b$ (Å)           | 12.8042(8)                                          | 17.0460(10)                                         | 10.1932(11)                               | 10.1602(4)                                | 11.1647(7)                                         | 12.6029(4)                               |
| $c$ (Å)           | 14.8588(9)                                          | 15.5962(9)                                          | 18.8112(14)                               | 18.8405(7)                                | 18.3301(12)                                        | 18.4402(7)                               |
| $\alpha$ (deg.)   | 82.135(5)                                           | 90                                                  | 74.610(8)                                 | 105.507(3)                                | 78.746(4)                                          | 91.644(3)                                |
| $\beta$ (deg.)    | 85.347(5)                                           | 97.400(2)                                           | 88.130(6)                                 | 90.534(3)                                 | 89.505(4)                                          | 97.180(3)                                |
| $\gamma$ (deg.)   | 80.847(5)                                           | 90                                                  | 68.295(8)                                 | 112.600(4)                                | 75.339(4)                                          | 114.573(3)                               |

S4

|                                                              |             |             |             |             |             |             |
|--------------------------------------------------------------|-------------|-------------|-------------|-------------|-------------|-------------|
| vol ( $\text{\AA}^3$ )                                       | 1947.2(2)   | 3297.6(3)   | 1693.1(2)   | 1649.22(11) | 2114.0(2)   | 2229.57(14) |
| <i>Z</i>                                                     | 2           | 4           | 2           | 2           | 2           | 2           |
| $\rho$ (calcd) ( $\text{g.cm}^{-3}$ )                        | 1.312       | 1.230       | 1.161       | 1.188       | 1.178       | 1.207       |
| $\mu$ ( $\text{mm}^{-1}$ )                                   | 0.332       | 0.295       | 0.836       | 0.103       | 0.107       | 0.186       |
| <i>F</i> (000)                                               | 804         | 1288        | 636         | 632         | 808         | 860         |
| reflections collected                                        | 12610       | 43632       | 20449       | 10292       | 40150       | 15243       |
| unique reflections                                           | 6849        | 5597        | 6002        | 6437        | 9058        | 10800       |
| <i>R</i> <sub>int</sub>                                      | 0.0443      | 0.0536      | 0.0414      | 0.0292      | 0.0688      | 0.0312      |
| R1 indices [ <i>I</i> >2 $\sigma$ ( <i>I</i> )] <sup>a</sup> | 0.0575      | 0.0810      | 0.0407      | 0.0459      | 0.0563      | 0.0485      |
| wR2 indices (all data) <sup>b</sup>                          | 0.1424      | 0.2215      | 0.1134      | 0.1022      | 0.1405      | 0.1288      |
| Largest peak and hole<br>( $\text{e.\AA}^{-3}$ )             | 0.63, -0.40 | 1.40, -0.71 | 0.30, -0.29 | 0.31, -0.34 | 0.34, -0.29 | 0.47, -0.30 |

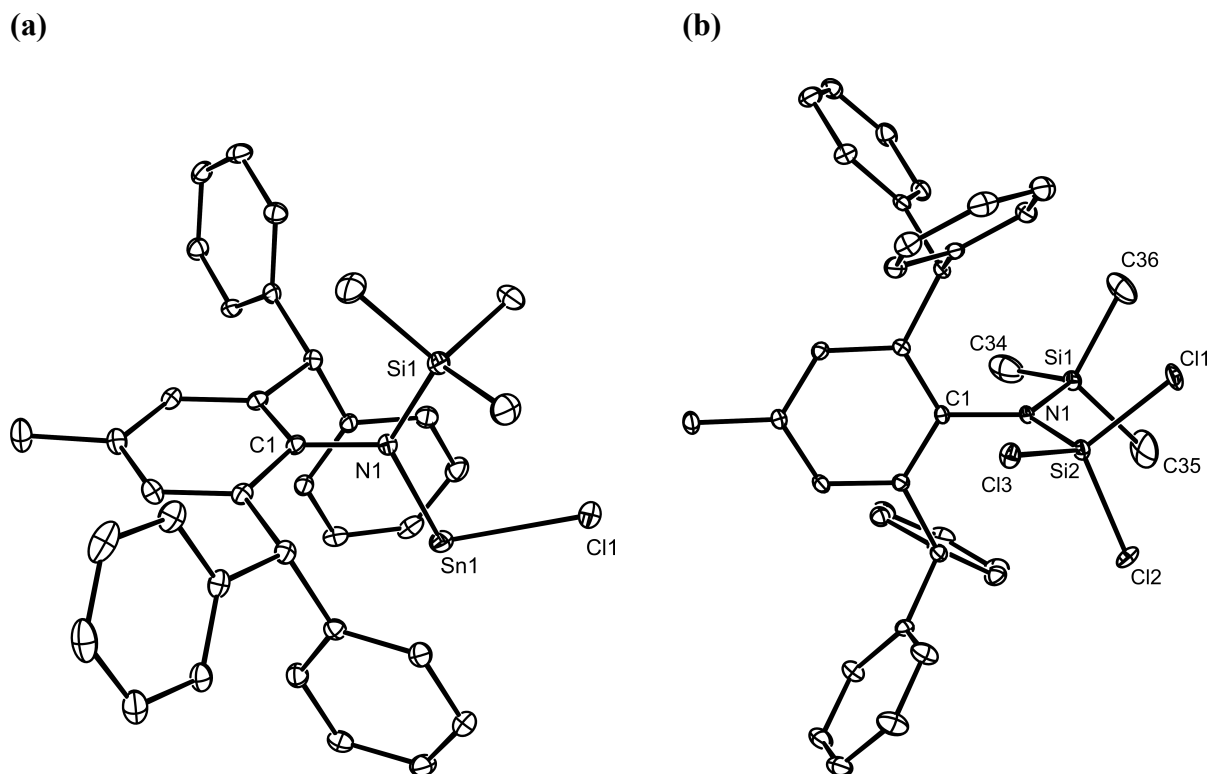

**Figure S1.** Molecular structure of (a) 7 and (b) 12 (25% displacement ellipsoids are shown; hydrogens omitted). See main text for geometrical parameters.

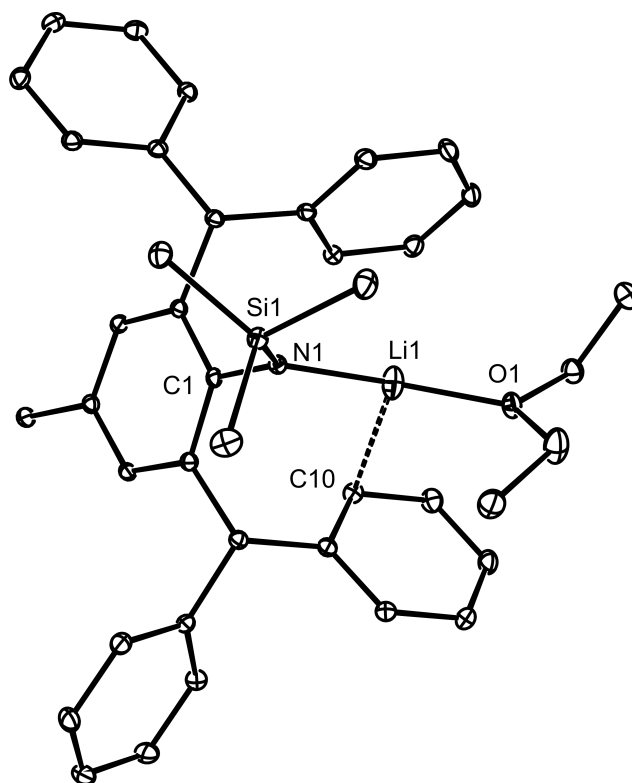

**Figure S2.** Molecular structure of  $[\text{Li}(\text{OEt}_2)\{\text{N}(\text{SiMe}_3)(\text{Ar}^*)\}]$  **1S** (25% displacement ellipsoids are shown; hydrogens omitted;  $\text{Li}\cdots\text{C}$  contact at less than 2.80 Å shown as a dotted line). Selected bond lengths (Å) and angles (°): Si(1)-N(1) 1.6846(14), N(1)-C(1) 1.391(2), N(1)-Li(1) 1.883(4), Li(1)-C(10) 2.655(4), O(1)-Li(1) 1.880(4), C(1)-N(1)-Si(1) 125.53(11), C(1)-N(1)-Li(1) 114.39(14), Si(1)-N(1)-Li(1) 119.98(13).

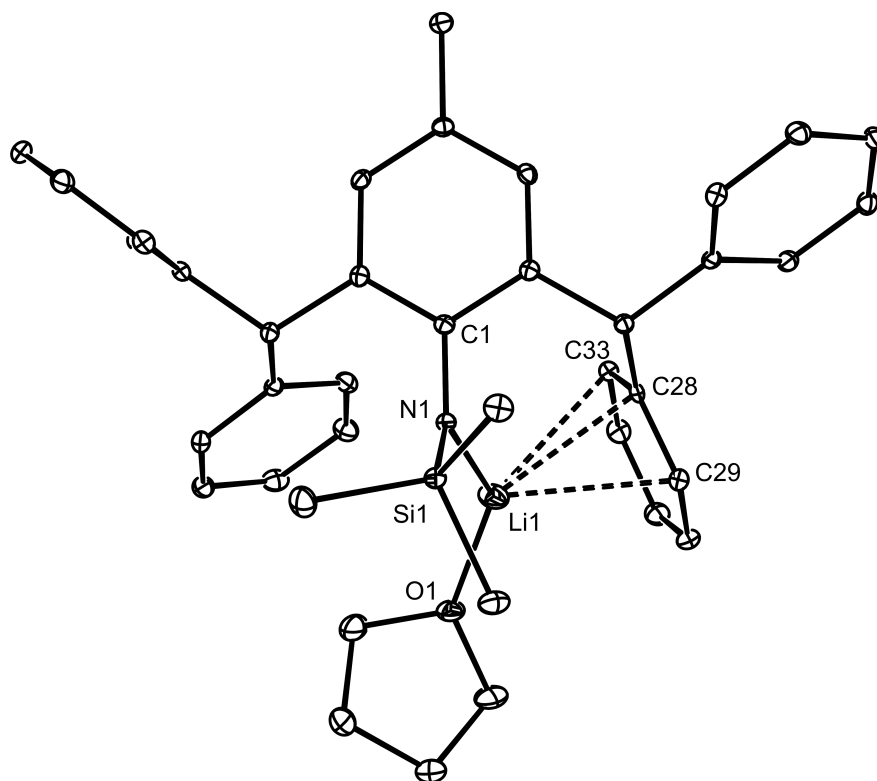

**Figure S3.** Molecular structure of  $[\text{Li}(\text{THF})\{\text{N}(\text{SiMe}_3)(\text{Ar}^*)\}] \mathbf{2S}$  (25% displacement ellipsoids are shown; hydrogens omitted;  $\text{Li}\cdots\text{C}$  contacts at less than 2.80 Å shown as dotted lines). Selected bond lengths (Å) and angles ( $^\circ$ ):  $\text{Si}(1)\text{-N}(1)$  1.6871(13),  $\text{O}(1)\text{-Li}(1)$  1.895(3),  $\text{N}(1)\text{-C}(1)$  1.3925(19),  $\text{N}(1)\text{-Li}(1)$  1.912(3),  $\text{C}(28)\text{-Li}(1)$  2.564(3),  $\text{C}(29)\text{-Li}(1)$  2.703(4),  $\text{C}(33)\text{-Li}(1)$  2.707(4),  $\text{C}(1)\text{-N}(1)\text{-Si}(1)$  123.85(11),  $\text{C}(1)\text{-N}(1)\text{-Li}(1)$  117.82(14),  $\text{Si}(1)\text{-N}(1)\text{-Li}(1)$  116.37(11),

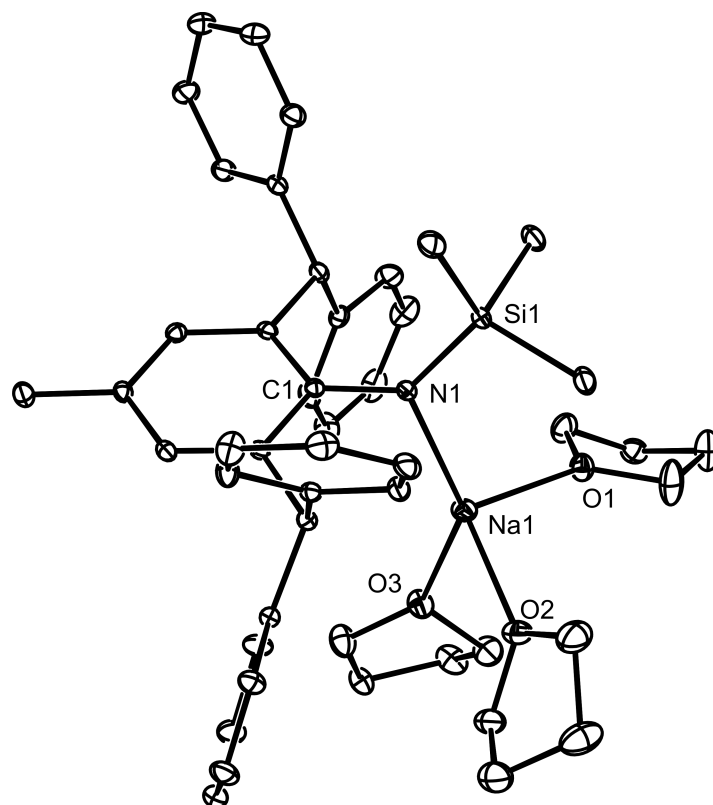

**Figure S4.** Molecular structure of  $[\text{Na}(\text{THF})_3\{\text{N}(\text{SiMe}_3)(\text{Ar}^*)\}]$  **3S** (25% displacement ellipsoids are shown; hydrogens omitted). Selected bond lengths (Å) and angles (°): Si(1)-N(1) 1.6733(18), Na(1)-O(1) 2.3162(17), Na(1)-N(1) 2.3411(18), Na(1)-O(2) 2.3491(18), Na(1)-O(3) 2.3632(18), N(1)-C(1) 1.377(2), C(1)-N(1)-Si(1) 130.11(14), C(1)-N(1)-Na(1) 112.91(12), Si(1)-N(1)-Na(1) 116.93(9).



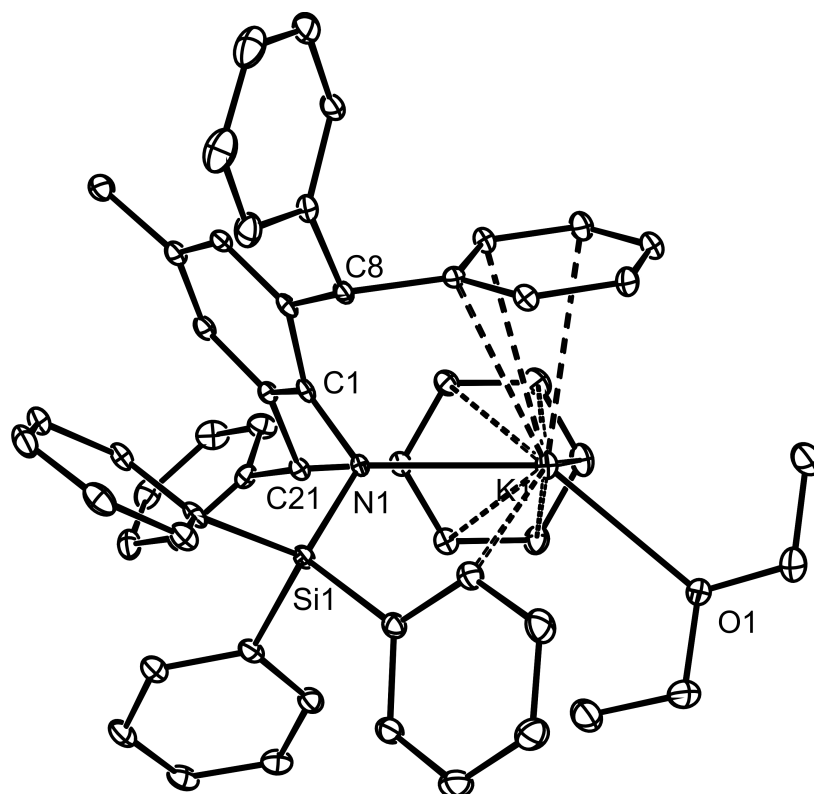

**Figure S5.** Molecular structure of  $[\text{K}(\text{OEt}_2)\{\text{N}(\text{SiPh}_3)(\text{Ar}^*)\}]$  **4S** (25% displacement ellipsoids are shown; hydrogens omitted;  $\text{K}\cdots\text{C}$  contacts at less than 3.50 Å shown as dotted lines). Selected bond lengths (Å) and angles (°):  $\text{K}(1)\text{-N}(1)$  2.649(3),  $\text{K}(1)\text{-O}(1)$  2.778(3),  $\text{Si}(1)\text{-N}(1)$  1.675(3),  $\text{N}(1)\text{-C}(1)$  1.390(5),  $\text{C}(1)\text{-N}(1)\text{-Si}(1)$  118.8(2),  $\text{C}(1)\text{-N}(1)\text{-K}(1)$  119.9(2),  $\text{Si}(1)\text{-N}(1)\text{-K}(1)$  121.27(14).

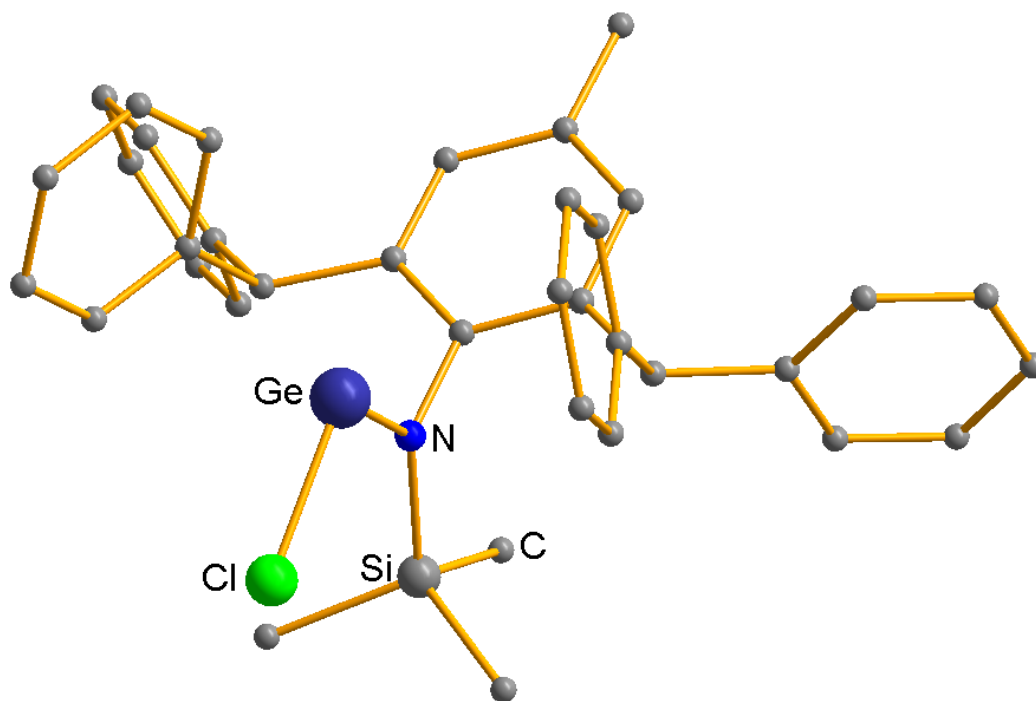

**Figure S6.** Calculated structure of **4** (BP86/RI-DFT/SVP, hydrogen atoms are omitted for clarity).

|                | <b>molecular structure</b> | <b>calculated structure</b> | <b>difference</b> |
|----------------|----------------------------|-----------------------------|-------------------|
| <b>Cl-Ge</b>   | 2.257                      | 2.287                       | 0.030             |
| <b>Ge-N</b>    | 1.855                      | 1.904                       | 0.049             |
| <b>N-Si</b>    | 1.769                      | 1.817                       | 0.048             |
| <b>N-C</b>     | 1.460                      | 1.441                       | -0.019            |
|                |                            |                             |                   |
| <b>Cl-Ge-N</b> | 98.85                      | 99.61                       | 0.76              |
| <b>Ge-N-Si</b> | 130.54                     | 129.81                      | 0.73              |
| <b>Ge-N-C</b>  | 110.95                     | 110.92                      | 0.03              |

**Table S2.** Comparison of the metrical parameters of the molecular structure of **4** with those of its calculated gas phase structure (bond lengths: Å and angles: °).

**Table S3.** Cartesian coordinates for the calculated structure of **4**.

76

|    |          |          |          |
|----|----------|----------|----------|
| N  | -0.00100 | 1.00200  | 0.49100  |
| Ge | -0.00500 | 0.00500  | 2.11300  |
| Si | 0.00400  | 2.80000  | 0.23100  |
| C  | 0.00100  | 0.12500  | -0.65200 |
| C  | -1.54300 | 3.61500  | 0.97000  |
| C  | 0.00800  | 3.10200  | -1.64500 |
| C  | 1.55000  | 3.61100  | 0.97700  |
| C  | -1.22700 | -0.33100 | -1.21800 |
| C  | 1.23100  | -0.32700 | -1.22000 |
| H  | -2.47900 | 3.27000  | 0.47500  |
| H  | -1.48300 | 4.72000  | 0.83400  |
| H  | -1.62100 | 3.40600  | 2.05800  |
| H  | 0.90500  | 2.66800  | -2.13800 |
| H  | 0.00500  | 4.19800  | -1.84200 |
| H  | -0.88500 | 2.66300  | -2.14300 |
| H  | 1.62800  | 3.39400  | 2.06400  |
| H  | 1.48800  | 4.71600  | 0.84900  |
| H  | 2.48700  | 3.27000  | 0.48100  |
| C  | -1.20200 | -1.16700 | -2.35100 |
| C  | -2.55600 | 0.05400  | -0.55300 |
| C  | 1.20800  | -1.16200 | -2.35100 |
| C  | 2.55900  | 0.05800  | -0.55100 |
| H  | -2.15900 | -1.49200 | -2.79200 |
| C  | 0.00300  | -1.58800 | -2.94300 |
| H  | -2.43200 | 1.09600  | -0.19300 |
| C  | -2.82100 | -0.78700 | 0.70100  |
| C  | -3.74400 | 0.07500  | -1.52500 |
| H  | 2.16700  | -1.48500 | -2.79100 |
| H  | 2.43800  | 1.10300  | -0.19600 |
| C  | 2.81600  | -0.77800 | 0.70800  |
| C  | 3.75100  | 0.07000  | -1.51800 |
| C  | 0.01000  | -2.44900 | -4.18700 |
| C  | -2.53400 | -2.16900 | 0.75000  |
| C  | -3.38800 | -0.18100 | 1.84500  |
| C  | -4.69600 | -0.96200 | -1.59700 |
| C  | -3.89400 | 1.17700  | -2.39600 |
| C  | 2.52900  | -2.16000 | 0.75900  |
| C  | 3.37400  | -0.16700 | 1.85400  |
| C  | 4.69800  | -0.97200 | -1.58100 |
| C  | 3.91000  | 1.16800  | -2.39300 |
| H  | 0.19800  | -1.83600 | -5.09900 |
| H  | -0.96200 | -2.96600 | -4.33300 |
| H  | 0.81000  | -3.22100 | -4.14800 |
| H  | -2.07200 | -2.65700 | -0.12400 |
| C  | -2.81200 | -2.92300 | 1.90300  |
| C  | -3.65800 | -0.93100 | 3.00300  |
| H  | -3.61900 | 0.89800  | 1.82800  |
| H  | -4.61600 | -1.82600 | -0.91700 |
| C  | -5.75900 | -0.90500 | -2.51700 |
| C  | -4.95200 | 1.23800  | -3.31500 |
| H  | -3.16400 | 2.00300  | -2.35200 |
| H  | 2.07300  | -2.65100 | -0.11600 |
| C  | 2.80100  | -2.90900 | 1.91700  |
| C  | 3.63700  | -0.91300 | 3.01600  |
| H  | 3.60400  | 0.91100  | 1.83500  |
| H  | 4.61100  | -1.83200 | -0.89800 |
| C  | 5.76500  | -0.92300 | -2.49800 |

|    |          |          |          |
|----|----------|----------|----------|
| C  | 4.97200  | 1.22100  | -3.30800 |
| H  | 3.18300  | 1.99800  | -2.35500 |
| H  | -2.57800 | -4.00000 | 1.92000  |
| C  | -3.37100 | -2.30600 | 3.03500  |
| H  | -4.08900 | -0.43300 | 3.88800  |
| H  | -6.49300 | -1.72700 | -2.55200 |
| C  | -5.89100 | 0.19400  | -3.38100 |
| H  | -5.04700 | 2.11200  | -3.98200 |
| H  | 2.56800  | -3.98700 | 1.93500  |
| C  | 3.35300  | -2.28900 | 3.05000  |
| H  | 4.06200  | -0.41200 | 3.90200  |
| H  | 6.49500  | -1.74900 | -2.52600 |
| C  | 5.90600  | 0.17200  | -3.36500 |
| H  | 5.07400  | 2.09100  | -3.97800 |
| H  | -3.57800 | -2.89500 | 3.94400  |
| H  | -6.72600 | 0.24100  | -4.09900 |
| H  | 3.55400  | -2.87500 | 3.96200  |
| H  | 6.74500  | 0.21100  | -4.08000 |
| Cl | -0.00700 | 1.72600  | 3.61900  |
